# Supplementary material for: Development and validation of the African Women Awareness of CANcer (AWACAN) tool for breast and cervical cancer
Source: PubMed Central journal article supplement (PMC6684059; doi:10.1371/journal.pone.0220545), 2019-08-06
Supplement: pone.0220545.s002.pdf [file pone.0220545.s002.pdf]

**Image 1: Change in position of nipple**

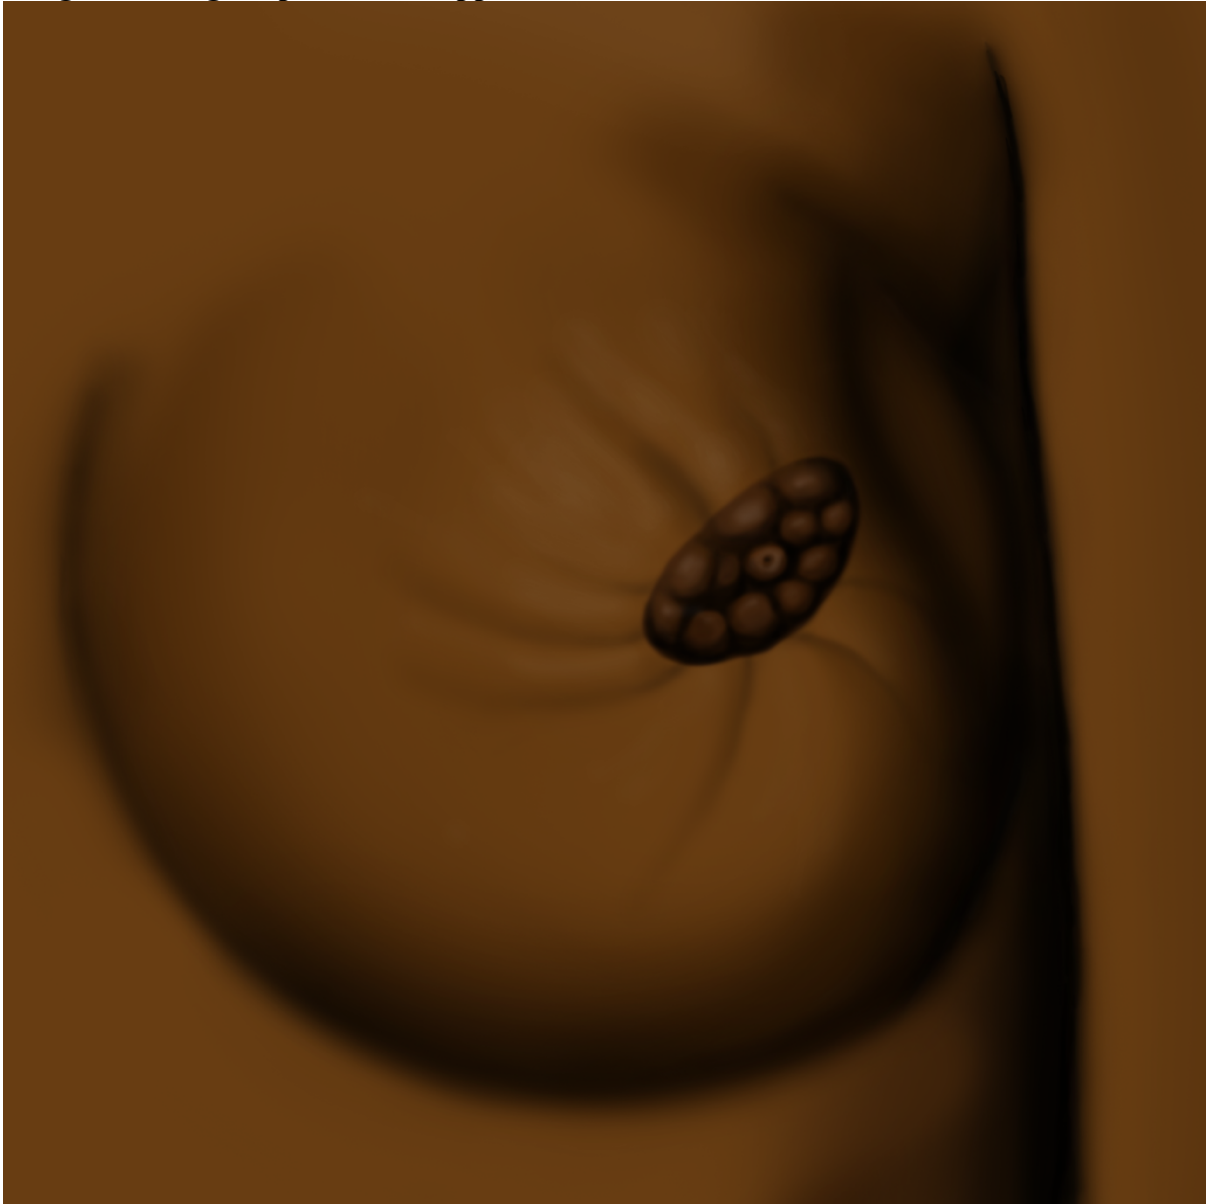

**Images by Donovan Ward as commissioned by Dr Lydia Cairncross, Grootte Schuur Hospital Breast Clinic, Cape Town, South Africa**

**Image 2: Nipple retraction**

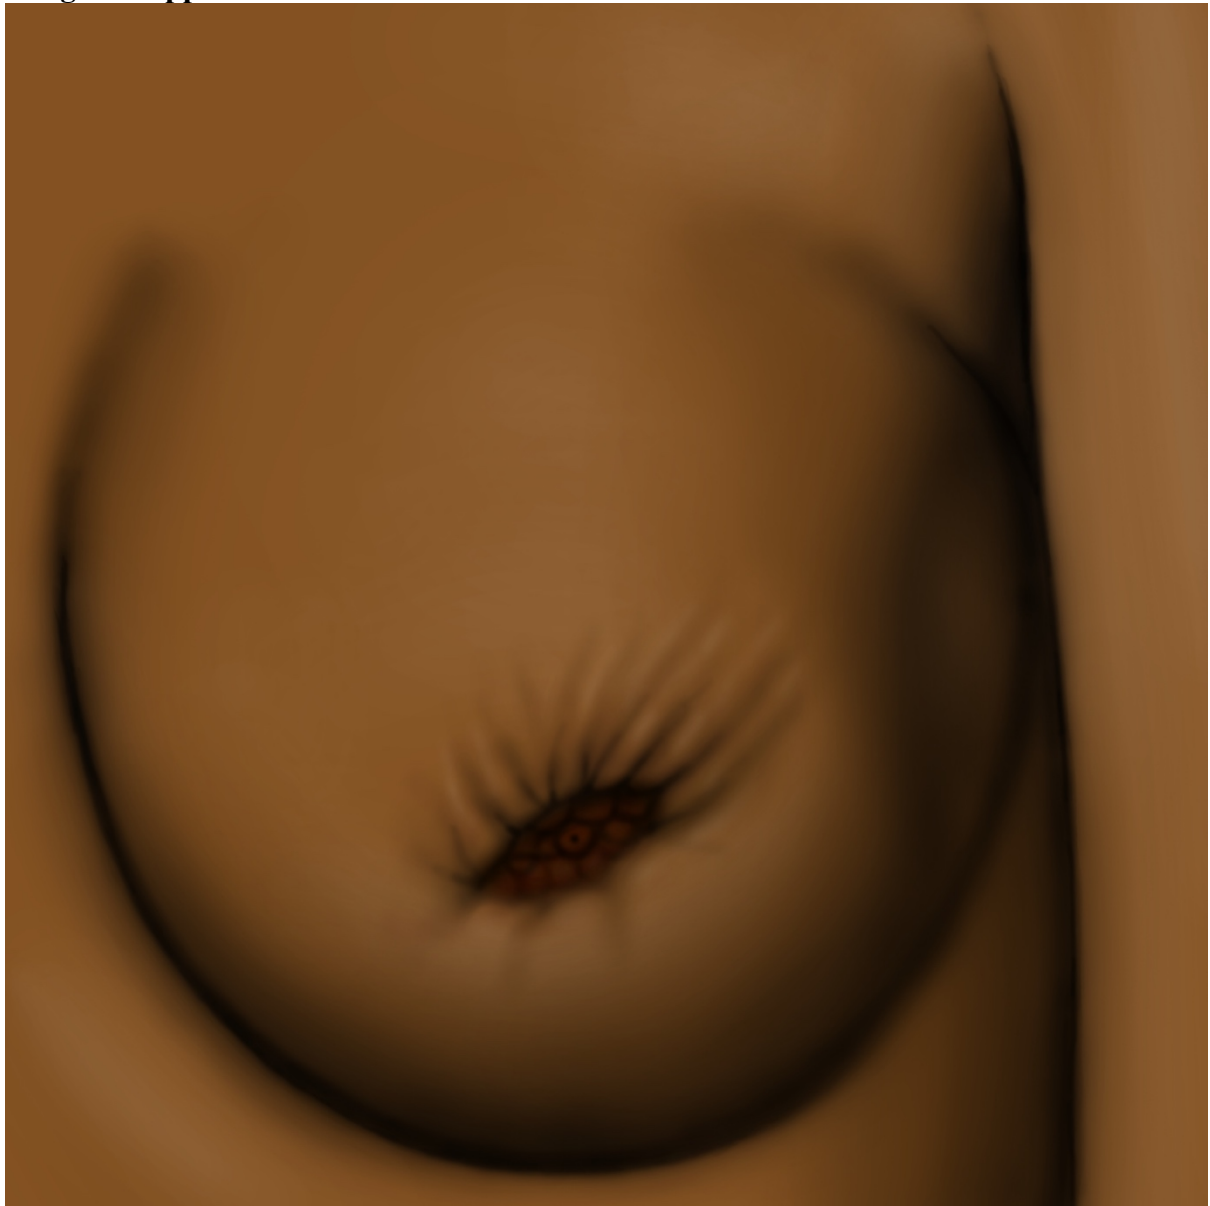

**Images by Donovan Ward as commissioned by Dr Lydia Cairncross, Grootte Schuur Hospital Breast Clinic, Cape Town, South Africa**

**Image 3: Orange peel appearance of skin**

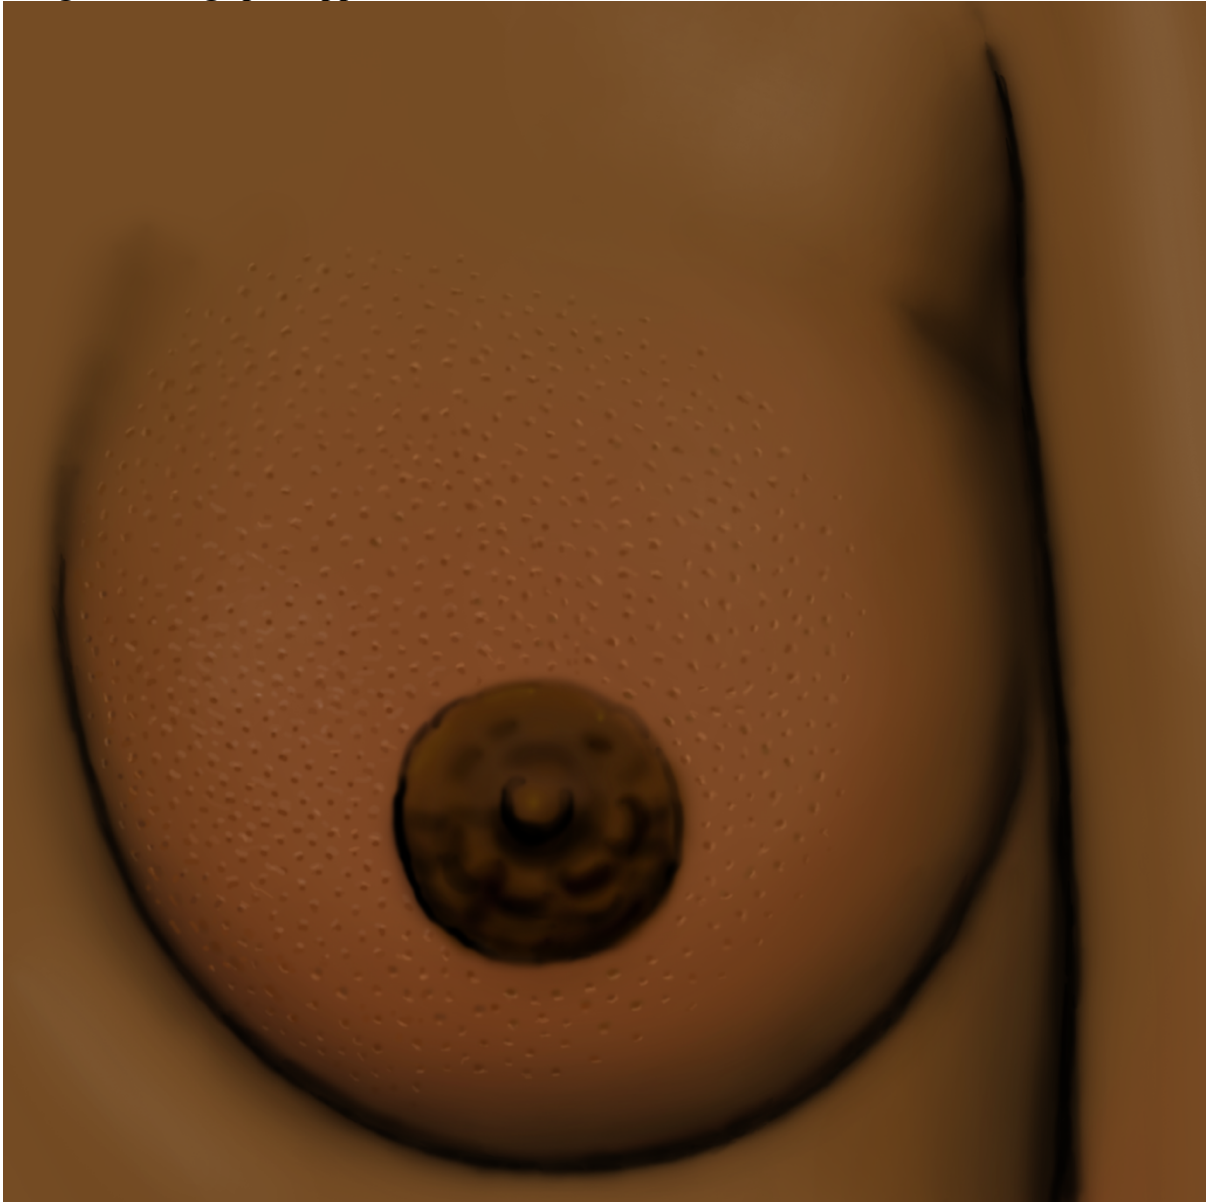

**Images by Donovan Ward as commissioned by Dr Lydia Cairncross, Grootte Schuur Hospital Breast Clinic, Cape Town, South Africa**
